# Supplementary material for: Patterns of Chromosomal Instability and Clonal Heterogeneity in Luminal B Breast Cancer: A Pilot Study
Source: MDPI journal article supplement (doi:10.3390/ijms25084478), 2024-04-19
Supplement: s1 [file s1]

# SUPPLEMENTARY MATERIALS

**Table S1.** Level of Chromosomal instability (CIN), Clonal Heterogeneity (True Diversity Index) and Aneuploidy observed in luminal B BC patients.

| RS            | PAT | CHR          | CIN<br>%  | CH<br>TD index | ANE<br>%  |
|---------------|-----|--------------|-----------|----------------|-----------|
| ER+/PR+/HER2- | B1  | CEP2         | 43        | 3.3            | 63        |
|               |     | CEP3         | 48        | 3.4            | 63        |
|               |     | CEP8         | 66        | 4.7            | 44        |
|               |     | CEP11        | 17        | 1.7            | 82        |
|               |     | CEP15        | 40        | 2.4            | 85        |
|               |     | CEP17        | 49        | 2.7            | 80        |
|               |     | <b>Total</b> | <b>44</b> | <b>3.0</b>     | <b>70</b> |
|               | B2  | CEP2         | 58        | 4.3            | 41        |
|               |     | CEP3         | 47        | 3.8            | 49        |
|               |     | CEP8         | 57        | 3.7            | 46        |
|               |     | CEP11        | 32        | 2.2            | 78        |
|               |     | CEP15        | 20        | 1.8            | 80        |
|               |     | CEP17        | 37        | 3.0            | 41        |
|               |     | <b>Total</b> | <b>42</b> | <b>3.1</b>     | <b>56</b> |
|               | B3  | CEP2         | 50        | 4.2            | 52        |
|               |     | CEP3         | 42        | 3.3            | 50        |
|               |     | CEP8         | 43        | 3.2            | 58        |
|               |     | CEP11        | 34        | 2.3            | 82        |
|               |     | CEP15        | 37        | 2.3            | 81        |
|               |     | CEP17        | 42        | 2.3            | 90        |
|               |     | <b>Total</b> | <b>41</b> | <b>2.9</b>     | <b>69</b> |
|               | B4  | CEP2         | 51        | 4.0            | 43        |
|               |     | CEP3         | 60        | 4.0            | 55        |
|               |     | CEP8         | 48        | 2.3            | 92        |
|               |     | CEP11        | 21        | 1.9            | 86        |
|               |     | CEP15        | 53        | 2.7            | 85        |
|               |     | CEP17        | 63        | 5.1            | 43        |
|               |     | <b>Total</b> | <b>49</b> | <b>3.3</b>     | <b>67</b> |
| ER+/PR-/HER2- | B6  | CEP2         | 60,61     | 4.1            | 51        |
|               |     | CEP3         | 49        | 4.5            | 39        |
|               |     | CEP8         | 62        | 4.3            | 48        |
|               |     | CEP11        | 30,3      | 2.2            | 69        |
|               |     | CEP15        | 15        | 1.6            | 80        |
|               |     | CEP17        | 67        | 3.8            | 46        |
|               |     | <b>Total</b> | <b>47</b> | <b>3.4</b>     | <b>56</b> |
|               | B8  | CEP2         | 51        | 4.0            | 43        |

|               |            |              |           |            |           |
|---------------|------------|--------------|-----------|------------|-----------|
| ER+/PR+/HER2+ |            | CEP3         | 59        | 4.7        | 37        |
|               |            | CEP8         | 42        | 3.1        | 60        |
|               |            | CEP11        | 19        | 1.7        | 89        |
|               |            | CEP15        | 45        | 3.6        | 53        |
|               |            | CEP17        | 44        | 2.9        | 66        |
|               |            | <b>Total</b> | <b>43</b> | <b>3.3</b> | <b>58</b> |
|               | <b>B10</b> | CEP2         | 40        | 2.5        | 80        |
|               |            | CEP3         | 39        | 3.0        | 46        |
|               |            | CEP8         | 46        | 3.1        | 50        |
|               |            | CEP11        | 21        | 1.9        | 71        |
|               |            | CEP15        | 30        | 2.3        | 70        |
|               |            | CEP17        | 21        | 1.9        | 57        |
|               |            | <b>Total</b> | <b>33</b> | <b>2.5</b> | <b>62</b> |
|               | <b>B5</b>  | CEP2         | 44        | 3.0        | 73        |
|               |            | CEP3         | 54        | 4.4        | 54        |
|               |            | CEP8         | 33        | 2.6        | 70        |
|               |            | CEP11        | 13        | 1.6        | 85        |
|               |            | CEP15        | 12        | 1.4        | 100       |
|               |            | CEP17        | 50        | 2.7        | 82        |
|               |            | <b>Total</b> | <b>34</b> | <b>2.6</b> | <b>77</b> |
|               | <b>B7</b>  | CEP2         | 38        | 2.9        | 47        |
|               |            | CEP3         | 58        | 4.4        | 43        |
|               |            | CEP8         | 62        | 4.4        | 48        |
|               |            | CEP11        | 32        | 2.2        | 84        |
|               |            | CEP15        | 64        | 3.9        | 52        |
|               |            | CEP17        | 56        | 3.5        | 64        |
|               |            | <b>Total</b> | <b>52</b> | <b>3.5</b> | <b>56</b> |
|               | <b>B9</b>  | CEP2         | 42        | 2.9        | 69        |
|               |            | CEP3         | 38        | 3.0        | 47        |
|               |            | CEP8         | 38        | 2.4        | 79        |
|               |            | CEP11        | 12        | 1.6        | 58        |
|               |            | CEP15        | 22        | 1.8        | 86        |
|               |            | CEP17        | 61        | 3.8        | 52        |
|               |            | <b>Total</b> | <b>36</b> | <b>2.6</b> | <b>65</b> |

**Notes:** According to the CIN level (% CIN), each patient was classified as having low CIN (CIN=0-25%), intermediate CIN (CIN=26%-50%), high CIN (CIN=51%-70%), or extreme CIN (CIN>70%). Stable or unstable aneuploidy was determined for each chromosome. A chromosome was considered to have stable aneuploidy if more than 20% (>20%) of the cells have identical probe signal patterns, while a chromosome, with fewer than 20% (<20%) of the cells with identical probe signal patterns was considered to have unstable aneuploidy. **Abbreviations:** RS, Receptor Status; PAT, Patient; CHR, Chromosome; CIN, Chromosomal Instability; ANE, Aneuploidy.

**Table S2.** CEP copy number variation (gains and losses) observed in luminal B BC patients.

| RS            | PAT | CHR   | % CNV | TOTAL CNV |
|---------------|-----|-------|-------|-----------|
| ER+/PR+/HER2- | B1  | CEP2  | 1.77  | 1.17      |
|               |     | CEP3  | 1.53  |           |
|               |     | CEP8  | 1.41  |           |
|               |     | CEP11 | 0.2   |           |
|               |     | CEP15 | 0.47  |           |
|               |     | CEP17 | 1.65  |           |
|               | B2  | CEP2  | 1.47  | 0.93      |
|               |     | CEP3  | 1.54  |           |
|               |     | CEP8  | 1.22  |           |
|               |     | CEP11 | 0.39  |           |
|               |     | CEP15 | 0.24  |           |
|               |     | CEP17 | 0.69  |           |
|               | B3  | CEP2  | 2.01  | 1.14      |
|               |     | CEP3  | 1.58  |           |
|               |     | CEP8  | 0.76  |           |
|               |     | CEP11 | 0.43  |           |
|               |     | CEP15 | 0.45  |           |
|               |     | CEP17 | 1.6   |           |
|               | B4  | CEP2  | 1.5   | 1.78      |
|               |     | CEP3  | 2.46  |           |
|               |     | CEP8  | 1.55  |           |
|               |     | CEP11 | 0.25  |           |
|               |     | CEP15 | 1.66  |           |
|               |     | CEP17 | 3.27  |           |
| ER+/PR-/HER2- | B6  | CEP2  | 1.54  | 1.15      |
|               |     | CEP3  | 2.08  |           |
|               |     | CEP8  | 1.51  |           |
|               |     | CEP11 | 0.39  |           |
|               |     | CEP15 | 0.18  |           |
|               |     | CEP17 | 1.21  |           |
|               | B8  | CEP2  | 1.75  | 1.09      |
|               |     | CEP3  | 1.61  |           |
|               |     | CEP8  | 0.7   |           |
|               |     | CEP11 | 0.21  |           |
|               |     | CEP15 | 0.87  |           |
|               |     | CEP17 | 1.38  |           |
|               | B10 | CEP2  | 1.33  | 0.82      |
|               |     | CEP3  | 1.37  |           |

|               |           |       |      |             |
|---------------|-----------|-------|------|-------------|
| ER+/PR+/HER2+ |           | CEP8  | 1.27 | <b>0.93</b> |
|               |           | CEP11 | 0.27 |             |
|               |           | CEP15 | 0.4  |             |
|               |           | CEP17 | 0.3  |             |
|               | <b>B5</b> | CEP2  | 1.49 |             |
|               |           | CEP3  | 1.93 |             |
|               |           | CEP8  | 0.5  |             |
|               |           | CEP11 | 0.15 |             |
|               |           | CEP15 | 0.12 |             |
|               |           | CEP17 | 1.41 |             |
|               | <b>B7</b> | CEP2  | 1.1  |             |
|               |           | CEP3  | 1.56 |             |
|               |           | CEP8  | 1.65 |             |
|               |           | CEP11 | 0.38 |             |
|               |           | CEP15 | 1.41 |             |
|               |           | CEP17 | 1.57 |             |
|               | <b>B9</b> | CEP2  | 1.33 |             |
|               |           | CEP3  | 1.23 |             |
|               |           | CEP8  | 0.47 |             |
|               |           | CEP11 | 0.17 |             |
|               |           | CEP15 | 0.25 |             |
|               |           | CEP17 | 1.55 |             |

**Notes:** CEP2, CEP3, CEP8, CEP11, CEP15 and CEP17 copy number variations (gains and losses) were evaluated in all cases. According to the criteria for CEP copy number gain (mean CEP count  $\geq 3$ ) and loss (mean CEP count  $< 1.6$ ). **Abbreviations:** RS, Receptor Status; PAT, Patients; CHR, Chromosome; CNV, Copy number variation

#### SUPPLEMENTARY FIGURE S1 CAPTION

**Figure S1.** Multivariate analysis with Pearson correlation coefficient between clonal heterogeneity (CH) and clinicopathologic characteristics. Values greater than 0.5 are indicative of a statistically significant correlation. No correlation was found between CH with any of the variables studied: histotype (HT), tumor size (T), lymph nodes (N), lymphovascular invasion (LI), progesterone receptor (PR), HER2 and KI67.
